# Supplementary material for: Antibacterial Au nanostructured surfaces
Source: Royal Society of Chemistry journal article supplement (doi:10.1039/c5nr06157a), 2015-11-23
Supplement: c5nr06157a1.pdf [file c5nr06157a1.pdf]

# Supporting Information for **Antibacterial Au nanostructured surfaces**

Songmei Wu,<sup>1,2\*</sup> Flavia Zuber<sup>3</sup>, Juergen Brugger<sup>2</sup>,

Katharina Maniura-Weber<sup>3</sup>, and Qun Ren<sup>3\*</sup>

<sup>1</sup> School of Science, Beijing Jiaotong University,

No.3 Shangyuancun, Haidian District, Beijing 100044, P. R. China

<sup>2</sup> Microsystems Laboratory, École Polytechnique Fédérale de Lausanne,

Station 17, 1015 Lausanne, Switzerland

<sup>3</sup> Laboratory for Biointerfaces, Empa, Swiss Federal Laboratories for Materials Science and  
Technology, Lerchenfeldstrasse 5, 9014 St. Gallen, Switzerland

# 1. Plasma etching of W through alumina nanoporous template

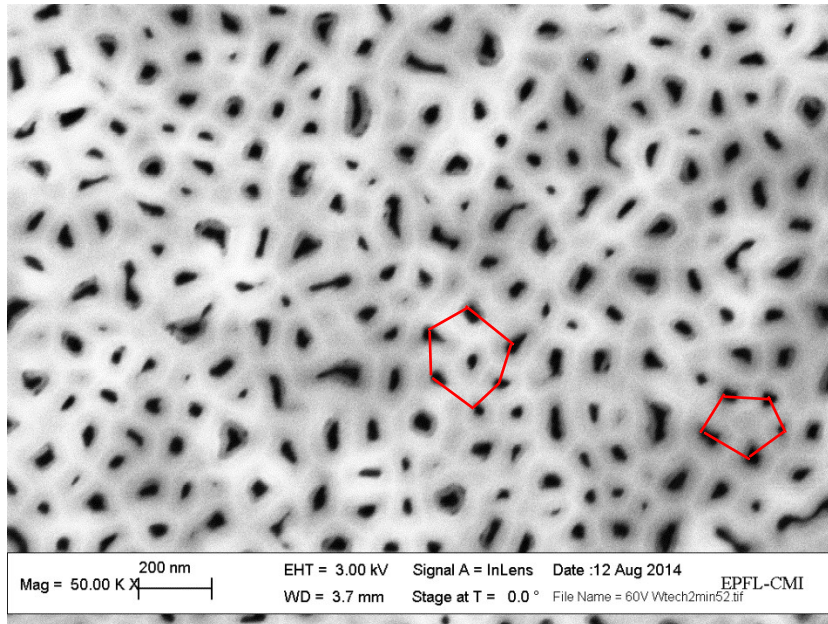

Figure S1 : Top view of alumina nanoporous template after plasma etching of W. The nanopores are self-organized in a near-hexagonal pattern as indicated. Based on which nanorings and nanonuggets are formed.

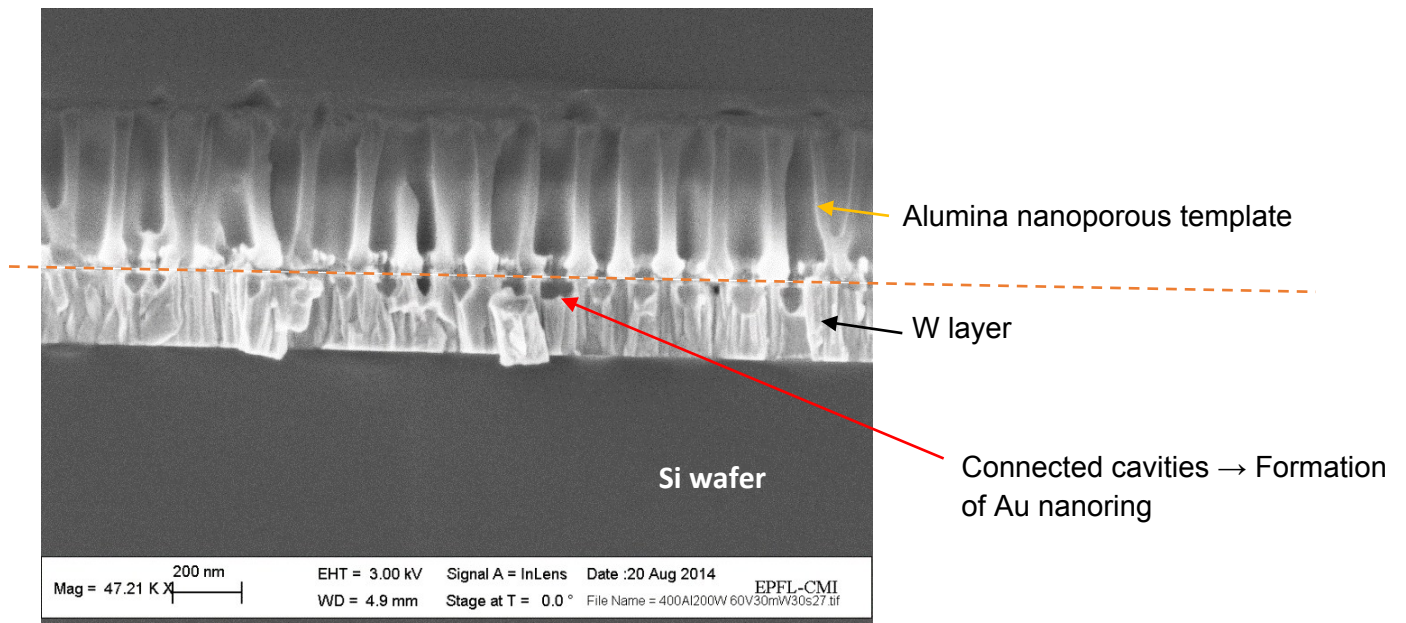

Figure S2 : Cross section image of the template after plasma etching of W-30s

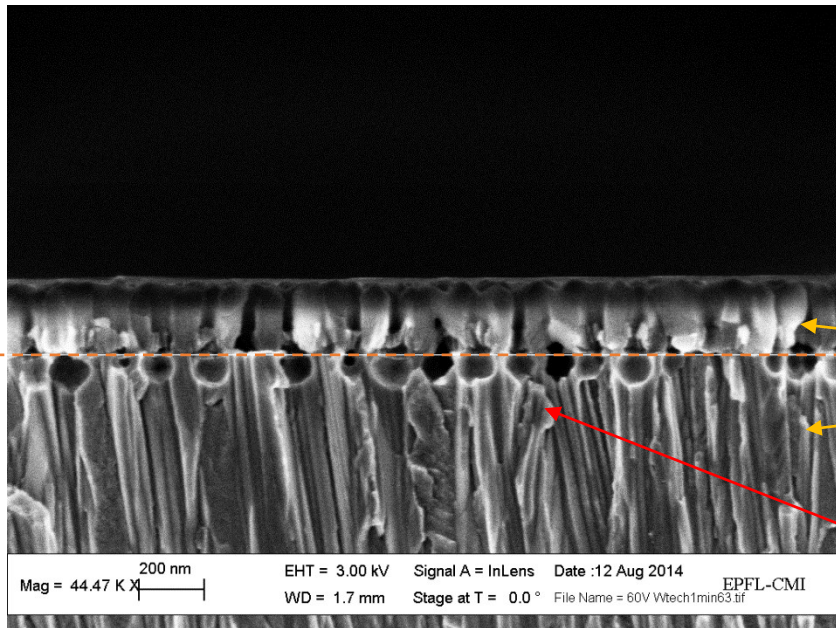

Alumina nanoporous template

W layer

Large connected cavities →  
Formation of Au nanonugget

Figure S3 : Cross section image of the template after plasma etching of W-60s. The W layer is thick (1  $\mu\text{m}$ ) in this case.

## 2. Comparison of antibacterial properties for nanopillar structures

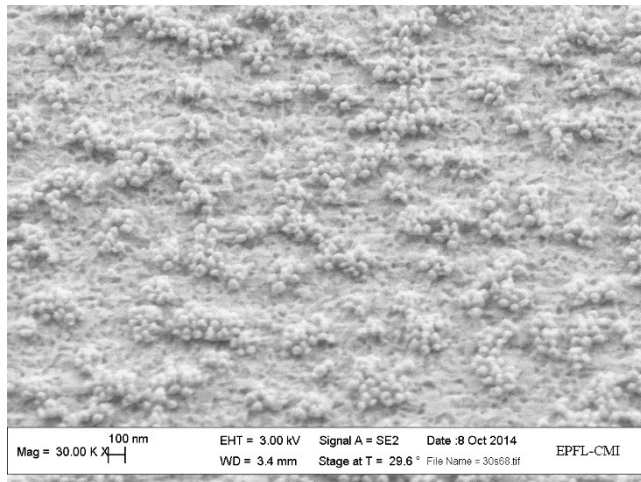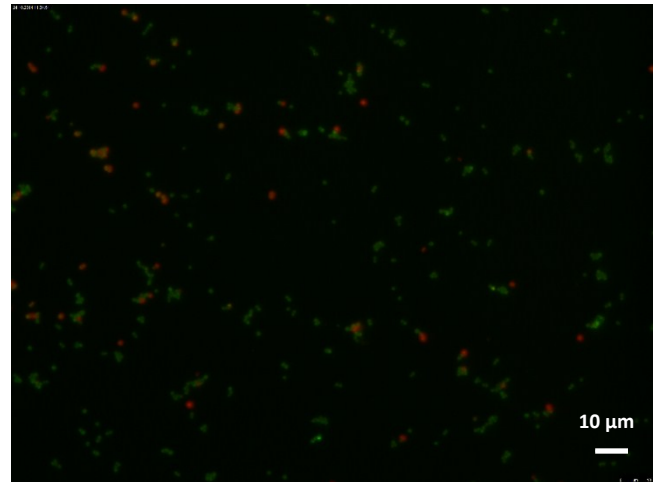

Figure S4 : Au nano-dots on W reference substrate by deposition time of 30 s. Most of the *S. aureus* cells appear alive.

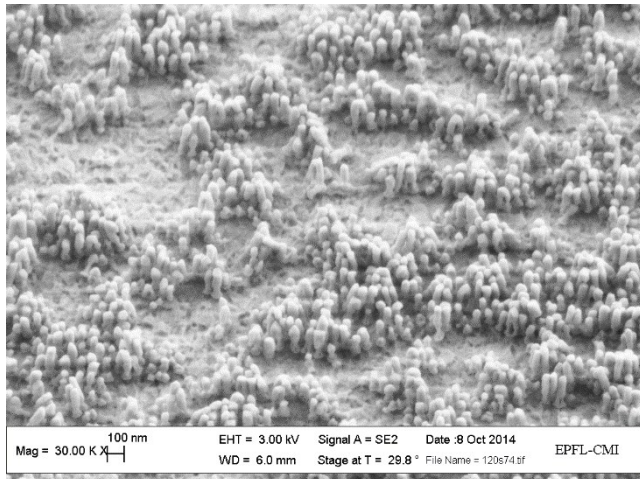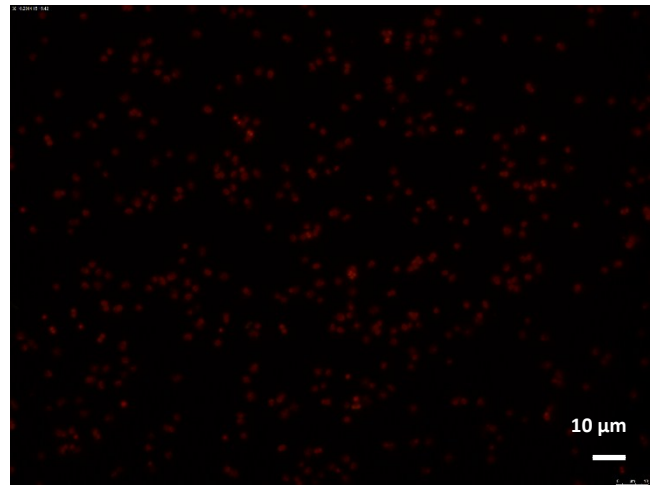

Figure S5 : Au nano-pillar on W reference substrate by deposition time of 120 s. Nearly all the *S. aureus* cells appear dead.
